1 MultiMatch: Geometry-Informed  
2 Colocalization in Multi-Color  
3 Super-Resolution Microscopy

4 Julia Naas<sup>1,2</sup>, Giacomo Nies<sup>3,4</sup>, Housen Li<sup>3,4</sup>, Stefan  
5 Stoldt<sup>4,5,6</sup>, Bernhard Schmitzer<sup>7</sup>, Stefan Jakobs<sup>4,5,6,8</sup>  
6 and Axel Munk<sup>3,4\*</sup>

7 <sup>1</sup>Center for Integrative Bioinformatics Vienna (CIBIV), Max  
8 Perutz Labs, University of Vienna and Medical University of  
9 Vienna, Vienna BioCenter, Vienna, Austria.

10 <sup>2</sup>Vienna Biocenter PhD Program, a Doctoral School of the  
11 University of Vienna and Medical University of Vienna, Vienna,  
12 Austria.

13 <sup>3</sup>Institute for Mathematical Stochastics, University of Göttingen,  
14 Göttingen, Germany.

15 <sup>4</sup>Cluster of Excellence “Multiscale Bioimaging: from Molecular  
16 Machines to Networks of Excitable Cells” (MBExC), University  
17 of Göttingen, Göttingen, Germany.

18 <sup>5</sup>Department of NanoBiophotonics Max Planck Institute for  
19 Multidisciplinary Sciences, Göttingen, Germany.

20 <sup>6</sup>Clinic of Neurology, University Medical Center Göttingen,  
21 Göttingen, Germany.

22 <sup>7</sup>Institute for Computer Science, University of Göttingen,  
23 Göttingen, Germany.

24 <sup>8</sup>Fraunhofer Institute for Translational Medicine and  
25 Pharmacology ITMP, Translational Neuroinflammation and  
26 Automated Microscopy TNM, Göttingen, Germany.

27 \*Corresponding author(s). E-mail(s):  
28 [munk@math.uni-goettingen.de](mailto:munk@math.uni-goettingen.de);

29 Contributing authors: [julia.naas@meduniwien.ac.at](mailto:julia.naas@meduniwien.ac.at);  
30 [thomas.nies@uni-goettingen.de](mailto:thomas.nies@uni-goettingen.de); [housen.li@mathematik.uni-](mailto:housen.li@mathematik.uni-goettingen.de)  
31 [goettingen.de](mailto:goettingen.de); [stefan.stoldt@mpinat.mpg.de](mailto:stefan.stoldt@mpinat.mpg.de);  
32 [schmitzer@cs.uni-goettingen.de](mailto:schmitzer@cs.uni-goettingen.de); [sjakobs@gwdg.de](mailto:sjakobs@gwdg.de);

### 33 Abstract

34 With recent advances in multi-color super-resolution light microscopy  
35 it has become possible to simultaneously visualize multiple subunits  
36 within complex biological structures at nanometer resolution. To opti-  
37 mally evaluate and interpret spatial proximity of stainings on such an  
38 image, colocalization analysis tools have to be able to integrate prior  
39 knowledge on the local geometry of the recorded biological complex.  
40 Here, we present *MultiMatch* to analyze the abundance and location  
41 of chain-like particle arrangements in multi-color microscopy based on  
42 multi-marginal optimal unbalanced transport methodology. Our object-  
43 based colocalization model statistically addresses the effect of incomplete  
44 labeling efficiencies enabling inference on existent, but not fully observ-  
45 able particle chains. We showcase that MultiMatch is able to consistently  
46 recover all existing chain structures in three-color STED images of DNA  
47 origami nanorulers and outperforms established geometry-uninformed  
48 triplet colocalization methods in this task in a simulation study. Further-  
49 more, MultiMatch also excels in the evaluation of simulated four-color  
50 STED images and generalizations to even more color channels can be  
51 immediately derived from our analysis. MultiMatch is provided as a  
52 user-friendly Python package comprising intuitive colocalization visual-  
53 izations and a computationally efficient network flow implementation.

54 **Keywords:** multi-marginal optimal unbalanced transport, colocalization  
55 analysis, super-resolution light microscopy, multi-color imaging

## 56 1 Introduction

57 Colocalization analysis aims to unravel the interconnection and interaction  
58 network between two or more groups of particles based on their spatial prox-  
59 imity in a microscopy image. By visualizing biological structures, like DNA,  
60 RNA and proteins, that are only a few nanometers in size, colocalization anal-  
61 ysis makes it possible to study a wide range of biological processes, such as  
62 DNA replication and the transcription of genes (Cainero et al, 2021), nuclear  
63 import of splicing factors (Costa et al, 2021) or the dynamics of cargo sorting  
64 zones in the trans-Golgi networks of plants (Shimizu et al, 2021), to name only  
65 a few.

66 In the following, we will denote any objects of interest that are depicted  
67 within a microscopy image, e.g., proteins as well as loci on DNA or RNA  
68 strands, as *particles*. In fluorescence light microscopy, such particles are

69 stained, i.e., in case they do not already intrinsically fluoresce, they are labelled  
70 with fluorophores, which in turn are excited by an external light source. The  
71 emitted fluorescence radiation then can be imaged via several microscopy  
72 technologies.

73 Diffraction unlimited super-resolution fluorescence microscopy technolo-  
74 gies, also called nanoscopy, are classified into two broad concepts (Sahl et al,  
75 2017):

76 In **coordinate-stochastic microscopy**, fluorophores within the sample  
77 are stochastically excited resulting in a temporally resolved blinking dynamic  
78 (Betzig et al, 2006; Hess et al, 2006; Rust et al, 2006), which allows to spa-  
79 tially separate fluorophores. Their coordinates are estimated by means of the  
80 detected radiation peak, yielding a *list of coordinates of detected fluorophores*  
81 as output data. If only one fluorophore is detected for one particle, the out-  
82 put translates into a list of particle coordinates. Else, fluorophore coordinates  
83 can be aggregated in order to localize the particle of interest in the imaged  
84 biological sample.

85 In **scanning-based microscopy** methods such as Stimulated Emission  
86 Depletion (STED; Hell and Wichmann, 1994; Hell, 2007; Klar et al, 2000), the  
87 fluorescence distribution is stored as an *intensity matrix*, in which every entry  
88 encodes the detected radiation within a respective pixel of the microscopy  
89 image. To obtain coordinate estimates of particle positions, object detection  
90 algorithms have to be applied to the intensity matrix.

91 In order to study possible particle interactions or connections, stainings  
92 with different fluorescent markers are recorded in different color channels. Par-  
93 ticles colocalize, if they are spatially closer than or equal to a *colocalization*  
94 *distance*, which heavily depends on the underlying biological setting and might  
95 be unknown prior to colocalization analysis (Malkusch et al, 2012).

96 Colocalization methods are divided in two categories based on the input  
97 data format they require:

98 **Pixel-based colocalization methods** take an intensity matrix as input  
99 and compare the pixel intensities across color channels, e.g., by utilizing over-  
100 lap, correlation or intensity transport analysis. Such approaches are thus only  
101 applicable for scanning-based images and examples for well-established meth-  
102 ods are Mander’s Colocalization Coefficient (Manders et al, 1993; Xu et al,  
103 2016), Pearson’s Correlation Coefficient (Adler and Parmryd, 2010), BlobProb  
104 (Fletcher et al, 2010), SACA (Wang et al, 2019) and OTC curves (Tameling  
105 et al, 2021).

106 **Object-based colocalization methods**, which our method MultiMatch  
107 classifies as, require the coordinates of particles and evaluate their distances.  
108 Examples for other object-based tools are ConditionalColoc (Vega-Lugo et al,  
109 2022) and Ripley’s K based methods (Ripley, 1976; Mukherjee et al, 2020) as  
110 SODA (Lagache et al, 2018).

111 Pairwise particle distances can be defined in several ways (Vega-Lugo et al,  
112 2022). In MultiMatch we implemented the distance between reference points,  
113 i.e., the center of the detected particle, as default. However, we also allow the

114 user to input a pre-defined particle-to-particle distance matrix, in case other  
115 approaches like the distance between object borders is preferred.

116 While nanoscopy for dual-color stainings is well studied for a long time,  
117 multi-color imaging including three or more stainings has received increased  
118 attention more recently since it allows simultaneous measurements of multiple  
119 particle types. There is a steadily increasing number of published multi-color  
120 STED microscopy datasets (Winter et al, 2017; Spahn et al, 2019; Butkevich  
121 et al, 2021; Glogger et al, 2022; Gonzalez Pisfil et al, 2022; Wang et al, 2022;  
122 Saal et al, 2023), of other super-resolution microscopy methods (Andronov  
123 et al, 2022; Unterauer et al, 2023) and the development of appropriate labeling  
124 methods allowing for an ever-increasing number of channels is ongoing (Beater  
125 et al, 2015; Butkevich et al, 2021; Willig et al, 2006; Reinhardt et al, 2023;  
126 Unterauer et al, 2023).

127 However, most pixel- and object-based colocalization tools are designed  
128 for and therefore limited to the analysis of two-color stainings. Applying  
129 them to multi-color images is not an obvious task: Particle arrangements  
130 with more than two different particle types can occur in different config-  
131 urations (Figure 1B), and depending on the biological context, some may  
132 be of interest and others may simply not exist in the imaged sample. A  
133 geometry-uninformed, pairwise analysis of all possible channel combinations  
134 (Smallcombe, 2001), as well as the few established methods that are explicitly  
135 presented as multi-color pixel-based (Sastre et al, 2019; Goucher et al, 2005;  
136 Humpert et al, 2015; Fletcher et al, 2010) and object-based (Haas and Peau-  
137 celle, 2021; Lagache et al, 2018; Vega-Lugo et al, 2022) colocalization tools  
138 are prone to overestimate colocalization, as soon as the biological complex of  
139 interest has a fixed geometry and stoichiometry, as we can show in a simula-  
140 tion study (Figure 2A). To exploit the full potential of multi-color microscopy  
141 imaging in such a situation, it is therefore beneficial to actively incorporate  
142 prior knowledge of the local geometry into the colocalization analysis.

143 To this end, we introduce MultiMatch, a widely applicable colocalization  
144 methodology based on optimal transport theory, which is especially tailored  
145 to detect chain-like, one-to-one particle arrangements. Integrating this type  
146 of colocalization geometry optimizes the multi-color colocalization analysis of  
147 quadruples, triples, pairs, and singlets, as they appear when marking different  
148 loci of a chain-like molecule with multi-color stainings.

149 One exemplary biological framework, in which the localization of such  
150 arrangements is especially insightful, is the highly condensed mammalian mito-  
151 chondrial genome: It is transcribed from both strands of the mitochondrial  
152 DNA as long polycistronic transcripts that have to undergo multiple processing  
153 steps, including endonucleolytic cleavage, in order to get to the different func-  
154 tional RNA species. Transcription of the heavy strand leads to polycistronic  
155 primary transcripts containing the premature mRNAs of 12 of the 13 OXPHOS  
156 subunits encoded in the mitochondrial genome. Labeling more than two of  
157 the mRNAs within such a primary construct, in combination with our novel  
158 colocalization approach, can significantly contribute to our understanding of

159 the post-transcriptional processing steps and their dynamics, that lead to the  
160 generation of matured mRNA molecules (Boettiger et al, 2016; Miron et al,  
161 2020).

162 However, even if the biological complex of interest itself is not chain-like,  
163 chain detection still can give substantial insights on the abundance and loca-  
164 tion of colocalization events inside a microscopy image as soon as the chain is  
165 a substructure of the colocalization geometry (Figure 1B). The converse, on  
166 the other hand, does not hold true in general.

167 We consider a particle arrangement as *chain-like* when exactly one particle  
168 of each type is stringed together in an ordered fashion and pairwise distances of  
169 chain-neighbors are smaller than or equal to a maximal colocalization thresh-  
170 old  $t$ . To fix the chain order of particles, we will refer to color channels, in  
171 which the respective particle type was imaged, as channel A, B, C, D etc.. For  
172 simplicity, we will explain the main methodology for a three-color setting in  
173 what follows, but MultiMatch is applicable to an arbitrary number of color  
174 channels, which we showcase in the evaluation of simulated four-color STED  
175 images (Section 2.5). We stress, that our software (see Section 4.8) is already  
176 designed to process any number of channels.

177 All configurations resulting from a three-color staining of an chain-like  
178 molecule are sketched in Figure 1C, where we assume the following unknown  
179 abundances  $\mathbf{n} = (n_{ABC}, n_{AB}, n_{BC}, n_A, n_B, n_C)$  of chain-like assemblies, where

180  $n_{ABC}$  is the number of true ABC triplets,  
181  $n_{AB}, n_{BC}$  is the numbers of true AB and BC pairs,  
182  $n_A, n_B, n_C$  is the numbers of true A, B and C singlets.

183 MultiMatch outputs detected abundances  $\mathbf{w} =$   
184  $(w_{ABC}, w_{AB}, w_{BC}, w_A, w_B, w_C)$  for a known colocalization distance  $t$  and  
185 depicts configuration positions on the respective microscopy image allowing  
186 further investigation on the spatial distribution of recorded biological com-  
187 plexes. If  $t$  is unknown (optionally channel-wise scaled) abundance curves  
188  $\mathbf{w}(t)$  are output for a user-defined range of  $t$  values. MultiMatch is compatible  
189 with the interactive Graphical User Interface of napari (Figure 1D) enabling  
190 the visual evaluation of structure locations for different  $t$  values in form of a  
191 colocalization threshold slider.

192 The differentiation between triplets, pairs, and singlets within a microscopy  
193 image is additionally hindered by incomplete labeling efficiencies and point  
194 detection artifacts. This is a notorious problem in fluorescence microscopy,  
195 e.g., described in Hummert et al (2021), and missing detections can add an  
196 unpredictable bias towards systematic underestimation of triplet numbers and  
197 overestimation of singlet abundances, if not corrected. Currently, the problem  
198 of incomplete labeling efficiency is barely addressed in the field of colocalization  
199 analysis.

200 Therefore, we propose a statistical framework to correct for incomplete  
201 labeling efficiencies and introduce an unbiased estimator  $\hat{\mathbf{n}}(t)$  of true chain-  
202 structure abundances and confidence statements on the estimated quantities.

## 6 MultiMatch Colocalization

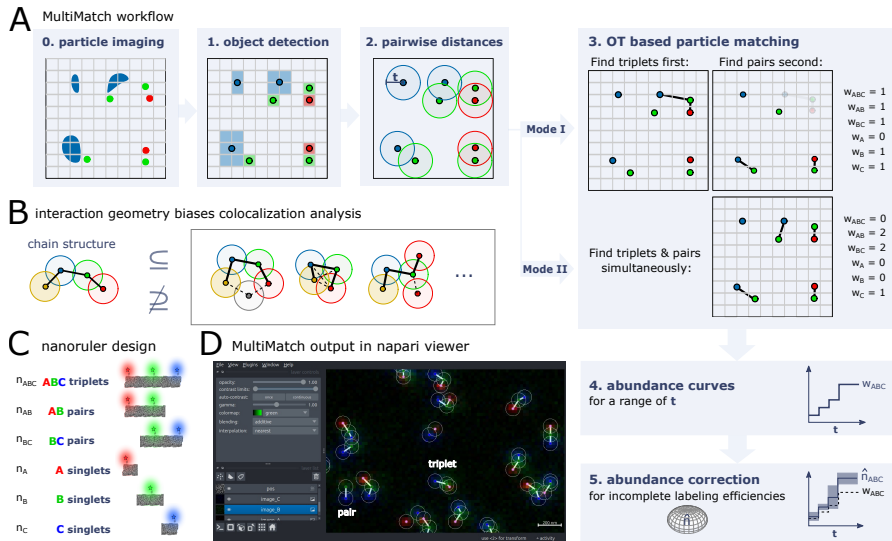

**Fig. 1 MultiMatch workflow to detect chain-like particle arrangements and experimental nanoruler design.** **A.** After microscopy imaging (0) and object detection (1), the distances between channel-specific lists of reference points or a user-defined distance matrix are input to the optimal matching procedure. Restricted on particle pairs with distance smaller or equal than colocalization distance  $t$  (2), MultiMatch either outputs the maximal number of triplets and subsequently pairs (Mode I) or simultaneously searches for triplets and pairs (Mode II) (3). MultiMatch provides the localization and number of detected chains for a known or abundance curves for a range of colocalization distances  $t$  (4). For known incomplete labeling efficiencies true abundances can be estimated with confidence statements (5). **B.** If more than two different particle types are involved, multiple geometric colocalization patterns can emerge. In case the chain is a substructure of the colocalization geometry of interest, its detection will help to localize and quantify colocalization events. **C.** Structures of interest in three-color colocalization analysis for chain-like, one-to-one particle interactions and fixed particle type order. All pairwise distances between neighboring particles in a chain are smaller or equal than colocalization distance  $t$ . **D.** Exemplary MultiMatch output for an experimental STED image of DNA origami nanoruler structures (as sketched in C) in the interactive napari viewer.

203 An overview on the full workflow of MultiMatch from microscopy image to  
 204 abundance curves is depicted in Figure 1A.

## 205 2 Results

### 206 2.1 Chain-like Particle Assembly Detection with 207 MultiMatch

208 Optimal transport (OT) theory (Villani, 2009) has a wide range of applications  
 209 throughout statistics (Panaretos and Zemel, 2019), data science and machine  
 210 learning (Peyré and Cuturi, 2020). Generally, OT aims to allocate (transport  
 211 plan) one mass distribution into another by minimizing the transportation  
 212 cost arising from moving one mass unit from one location to another. Applied

213 to fluorescence intensity distributions on a pixel grid and using the euclidean  
214 distances between pixels as transportation cost, OT introduces an intuitive  
215 distance between two microscopy images and could already successfully be uti-  
216 lized in the context of pixel-based, dual-color colocalization methods (Zaritsky  
217 et al, 2017; Taming et al, 2021).

218 For object-based analysis, reference points of detected particles can also  
219 be interpreted as support points of mass one of a (discrete) two-dimensional  
220 distribution. For only two color channels with the same number of particles the  
221 standard OT problem simply assigns each particle from the first channel to one  
222 particle from the second channel while minimizing the total sum of Euclidean  
223 matching costs. We can obtain an optimal matching between more than two  
224 particle types by multi-marginal OT (Kim and Pass, 2014; Pass, 2015) and  
225 at the same time account for the not necessarily equal numbers of support  
226 points per channel by utilizing an unbalanced OT formulation (Chizat et al,  
227 2018). A combination of both OT generalizations, i.e., multi-marginal optimal  
228 unbalanced transport problems, have been recently discussed in the literature  
229 (Friesecke et al, 2021; Heinemann et al, 2022; Beier et al, 2022; Le et al, 2022).

230 In this manner, the basic concept of MultiMatch can be interpreted as linear  
231 assignment problem as described, e.g., in the field of object tracking (Schulter  
232 et al, 2017; Chari et al, 2015; Jaqaman et al, 2008; Zhang et al, 2008). In  
233 contrast to methods of this research field, we explicitly formulate the matching  
234 problem as a function of the colocalization threshold, allowing to plot the  
235 chain abundances dependent on a range of  $t$ . Furthermore, we develop a novel  
236 statistical framework specific to labelled marker colocalization to infer on the  
237 statistical influence of incomplete labeling efficiency. We utilize the equivalence  
238 of the optimal transport methodology to a network flow problem to overcome  
239 the otherwise prohibitively high computational complexity of its corresponding  
240 linear program formulation (Lin et al, 2022; Supplementary Material A.2).

241 MultiMatch provides two different modes to solve the particle matching  
242 problem (Figure 1A(3)):

243 **Mode I:** By restricting a  $k$ -marginal optimal unbalanced transport prob-  
244 lem to particle pairs with a distance smaller than  $t$  and introducing a chain-cost  
245 that only considers distances between neighboring particle types (Supplemen-  
246 tary Material A.1), the resulting OT plan encodes the *maximal* number of, for  
247  $k = 3$ , triplets within the nanoscopy image. If requested, the matching process  
248 is subsequently repeated on the remaining particles to detect yet unresolved  
249 AB and BC pairs, respectively.

250 **Mode II:** This mode only detects AB, BC, etc. pairs by solving respective  
251 *two*-marginal unbalanced OT problems. Subsequently, the two-marginal OT  
252 matchings are coupled to chain structures: For  $k = 3$ , all pairs occupying the  
253 same intermediate particle are redefined as respective ABC triplet.

254 Depending on the underlying biological experiment, the user can select the  
255 appropriate mode for colocalization analysis: Mode I prioritizes the detection  
256 of a predefined chain structure of choice. For example, if a user aims to analyze  
257 triplets, Mode I will detect a triplet as soon as three particles A, B, and C are



258 close enough to each other – even if another particle A or C is nearby that would  
259 allow to match two pairs instead of one triplet (as depicted in Figure 1A(3)).  
260 If  $k > 3$  and the user wants to detect multiple chain structures, one needs to  
261 set a prioritization order for Mode I. For example, for  $k = 4$  and after ABCD  
262 quadruplet detection, one can search either for ABC or BCD triplets next.  
263 Depending on the order, the final matching results may change as soon as  
264 some particles cannot be uniquely assigned to one particle arrangement.

265 Mode II, on the other hand, does not need a predefined prioritization order  
266 of structures for subsequent matching steps, hence it does not overemphasize  
267 structures that are matched in the earlier steps. It is useful in case we do not  
268 have any prior knowledge on which structures might appear in the microscopy  
269 image and we do not want to prioritize any chain structures.

270 In the evaluation of experimental (Section 2.4 and Supplementary Material  
271 D, Figure D4) and simulated three-color STED microscopy images (Figure 2  
272 and Supplementary Material E.1, Fig. E5) we show that for sparse particle  
273 distributions and mixed singlets, pairs, and triplet ratios the differences in  
274 detected abundances between the two modes is neglectable. However, in case  
275 of dense particle distributions (see Supplementary Material E.2, Fig. E6 and  
276 Supplementary Material E.3, Fig. E7 B-D), or in case we know in advance that  
277 only one chain structure exists in the biological context, the multi-marginal  
278 approach of Mode I, which is also the default setting in the MultiMatch tool,  
279 outperforms the pairwise matching approach of Mode II.

## 280 2.2 Simulation Study

281 To systematically evaluate the performance of MultiMatch against compati-  
282 ble colocalization methods, we simulated 100 microscopy images for each of  
283 three scenarios with different combinations of singlets, pairs, and triplet abun-  
284 dances. For this simulation study, we decreased the noise level to a minimum to  
285 allow a fair comparison despite different point detection tools implemented in  
286 the respective colocalization tools. Also, we amplified simulating linear triplet  
287 structures over randomly folded triplets (see simulation setup in Section 4.4).  
288 For every simulated image,

289 **Scenario 1:** 50 singlets of each type A, B and C were simulated.

290 **Scenario 2:** 50 A, B and C singlets and 50 AB and BC pairs were simulated,  
291 respectively.

292 **Scenario 3:** 100 triplets and 50 AB and BC pairs and 50 A, B and C  
293 singlets were simulated, respectively.

294 Exemplary, simulated images and the results of the simulation study for a  
295 fixed colocalization threshold of  $t = 5$  pixels are shown in Figure 2. Analysis  
296 results for all considered methods across a range of colocalization thresholds  
297 are presented in Supplementary Material E.1, Figure E5.

298 As a representative of pixel-based methods, we include BlobProb (Fletcher  
299 et al, 2010), which counts the number of colocalized intensity blobs, i.e., groups  
300 of neighboring pixels with high intensity. In each channel, blobs are detected



301 via image segmentation and for each blob the local intensity maximum is  
302 defined as reference particle coordinate. A blob pair colocalizes if the first  
303 reference point lies within the second blob and vice versa. Triplet colocaliza-  
304 tion is detected if all involved reference points are included in all three blobs.  
305 SODA (Lagache et al, 2018) is an object-based method, which uses the Rip-  
306 ley’s K function (Ripley, 1976) and computes the coupling probability of point  
307 pairs based on marked-point process theory. In the most recently published  
308 method ConditionalColoc (Vega-Lugo et al, 2022) particles are defined as colo-  
309 calized as soon as their distance is below a maximal colocalization radius.  
310 Then, utilizing Bayes’ Theorem, (conditional) probabilities are computed and  
311 assigned for triplet and pair colocalization. We experienced that Condition-  
312 alColoc, although aiming to output probabilities, in some cases yields values  
313 greater than one and hence the errors in relative abundance detection are not  
314 bounded by one as well. For a better comparison, we restricted the respective  
315 results to values between -0.5 and 1 in Figure 2 and show ConditionalColoc  
316 outliers in Supplementary Material C (Figure C3).

317 In none of the above methods triplet colocalization is restricted to one-to-  
318 one interactions. This has barely any negative effect on the detection of singlets  
319 in Scenario 1, where no additional pairs and triplets occur. Apart from few  
320 outliers of overestimation in pairs and triplet abundances in ConditionalColoc  
321 and SODA, all considered colocalization measures show consistently low errors  
322 with small variability. The maximal median error in relative abundances of  
323 0.03 in Scenario 1 is obtained by ConditionalColoc in the detection of AB as  
324 well as BC pairs.

325 In Scenarios 2 and 3 on the other hand, we observe a consistent overestima-  
326 tion of relative pairs and triplet abundances in object-based methods SODA  
327 and ConditionalColoc, since one particle can be included in several structures  
328 at the same time. Additionally, in Scenario 2 SODA exhibits a larger varia-  
329 tion in pairs abundances, resulting in median errors 0.14 in both AB and BC  
330 pairs with interquartile ranges of 0.16, respectively. In Scenario 3 the variation  
331 in abundance detection decreased and median errors are 0.1 for ABC triplets  
332 and 0.04 for AB as well as BC pairs. ConditionalColoc performances worst in  
333 Scenario 3 yielding a median error of 0.48 for ABC triplets.

334 The pixel-based method BlobProb mostly obtains zero relative abundances  
335 of triplets and pairs across all three scenarios and hence severely underesti-  
336 mates the triplet and pair configurations within the simulated images. This  
337 is due to the high resolution in the simulation setup, which was chosen to  
338 mimic conventional STED imaging. If particles are small and their respective  
339 intensity blobs do not overlap, BlobProb does not detect any colocalization.

340 MultiMatch on the other hand searches for optimal matches on a global  
341 scale while considering the local geometry of chain-like particle assemblies. It  
342 consistently recovers the ground truth abundances for each simulation scenario.  
343 The maximal median error across all scenarios and chain structures for both  
344 Modes of MultiMatch is 0.03 with a maximal interquartile range in errors of  
345 0.04.

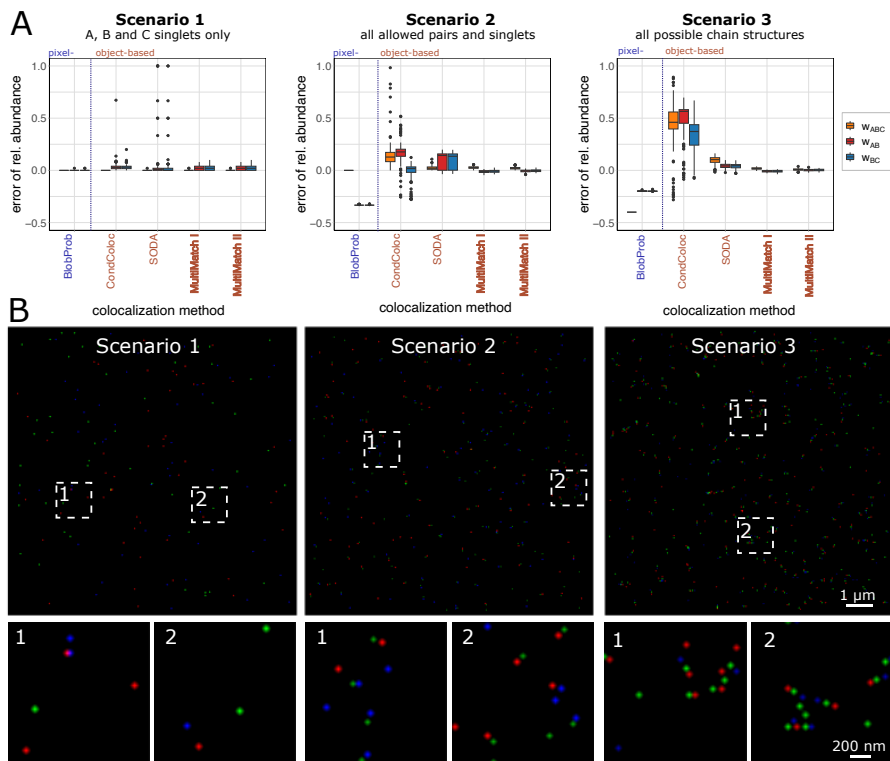

**Fig. 2 Simulation study for three combinations of chain structures.** In each Scenario 100 STED images and different abundances of triplets, pairs, and singlets were simulated with 100% labeling efficiency. **A.** Method specific boxplots of the errors in detected relative (scaled by the total number of points in channel B) structure abundances are displayed. The error is computed by subtracting true relative abundance from detected relative abundances. In *Scenario 1* only A,B and C singlets, in *Scenario 2* all possible singlets as well as AB and BC pairs and in *Scenario 3* ABC triplets, AB, BC pairs and A, B and C singlets were simulated. **B.** Simulated STED images for Scenarios 1, 2 and 3 with respective image details.

346 Apart from above considered, already established colocalization methods,  
347 we also implemented a Nearest Neighbor Matching as comparable object-based  
348 method. We can show that greedily matching particle pairs based on local  
349 optima leads to underestimation of ABC triplets in dense particle distributions  
350 (Supplementary Material E.2, Figure E6A-C).

### 351 2.3 Incomplete Labeling Efficiencies and Point Detection 352 Errors

353 In experimental STED microscopy, typically it is impossible to record all exist-  
354 ing particles of interest. This can, for example, be due to the fluorescent marker  
355 not being successfully attached to the probe or a flawed point detection. All

356 such scenarios resulting in a failure of particle detection for simplicity will be  
357 summarized under *incomplete labeling efficiency* hereafter.

358 If only singlets were to be counted in multi-color images with the same  
359 labeling efficiency across channels, the relative abundance could still be esti-  
360 mated consistently. However, as soon as configurations of two or more particle  
361 types are to be recovered, incomplete labeling efficiencies can lead to under-  
362 and overestimation of structures. Figure 3A shows that a triplet can be erro-  
363 neously detected as pair or singlet or not at all, which can introduce a severe  
364 bias. However, if the labeling efficiencies are known, the detection success of  
365 a particle can be modeled with a Bernoulli distribution, which allows the  
366 definition of an unbiased estimator  $\hat{\mathbf{n}}$  for the vector of true chain structures  
367 abundances  $\mathbf{n}$ . This approach allows for constructing multi-dimensional joint  
368 confidence ellipsoids covering  $\mathbf{n}$  with a given significance level, e.g.,  $\alpha = 0.1$   
369 (Figure 3B,C). The multi-dimensional confidence ellipsoid then can be respec-  
370 tively projected onto one dimension to obtain structure-specific confidence  
371 intervals or bands for a range of  $t$  values, while fixing the estimated abun-  
372 dances of all other considered structures. For more details on the statistical  
373 framework see Supplementary Material B.

## 374 2.4 Evaluation of Experimental STED Images

375 Chain-like particle structures occur within several biological complexes. To  
376 showcase the performance of our method on experimentally retrieved data we  
377 used one-, two- and three-color nanorulers. Nanorulers are DNA-origamis with  
378 a predefined distance between spots at which 20 fluorophores are attached  
379 and hence, as their name suggests, can be used as rulers inside a microscopy  
380 image (Cainero et al, 2021; Schmied et al, 2014, 2012; Rothmund, 2006). For  
381 this experimental setup, we chose nanorulers with pairwise distances between  
382 neighboring spots of 70 nanometers (nm). For each chain structure (as depicted  
383 in Figure 1C), respective nanoruler origamis are available in separate solutions,  
384 which allows us to control whether in an experiment we record singlets, pairs  
385 or triplets only or a combination of those structures. We performed three  
386 experiments:

387 **Setting 1:** The experiment consists of all three single marker nanorulers  
388 (22 images in total). We expect to detect no pairs or triplets, i.e.,  $w_{ABC} =$   
389  $w_{AB} = w_{BC} = 0$ .

390 **Setting 2:** The experiment consists of all three singlets, two pairs and  
391 triplet marker nanoruler solutions (22 images in total). We expect to detect  
392 all possible configurations, i.e., A, B and C singlets, AB and BC pairs as  
393 well as ABC triplets.

394 **Setting 3:** The experiment consists of only triplet marker nanorulers (12  
395 images in total). We expect to detect ABC triplets only, i.e.,  $w_{AB} = w_{AB} =$   
396  $w_A = w_B = w_C = 0$ .

397 For each experimental setting we recorded STED images of size  $400 \times 400$   
398 pixels with a pixel size of  $25 \times 25$  nm. In channel A, stainings with Star Red

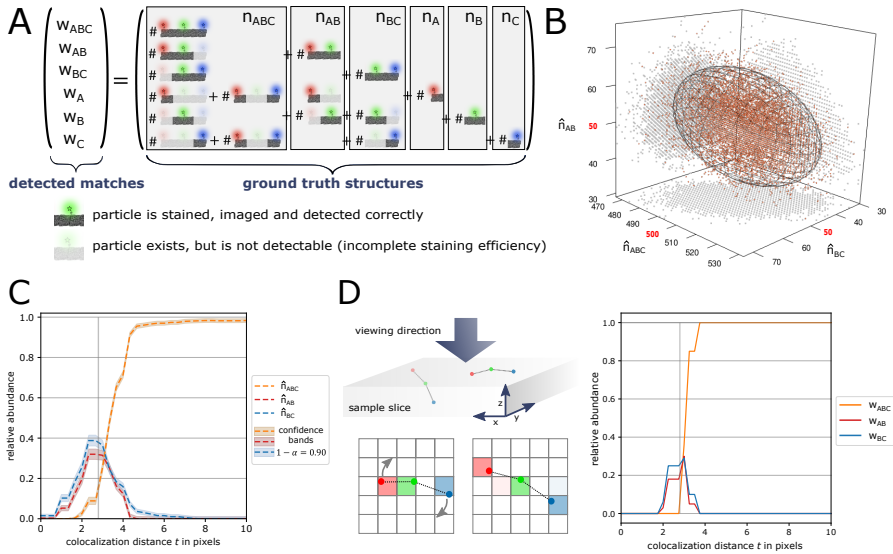

**Fig. 3 Incorporating incomplete labeling efficiency.** **A.** Because of channel-specific incomplete labeling efficiencies, triplets and pairs can erroneously be counted to other structure abundances. **B.** For entrywise large enough  $n$ , estimator  $\hat{n}$  is approximately multi-dimensional normal distributed: Estimated abundances of 10,000 simulations with labeling efficiencies  $s_A = s_B = s_C = 0.95$  and true abundances  $n_{ABC} = 500, n_{AB} = n_{BC} = n_A = n_B = n_C = 50$  (see Supplementary Material B.2). The respective 3-dimensional, normal 90% quantile ellipsoid is plotted. **C.** Estimated abundance curves for one of the experimental multi-color STED images in Setting 3 with additional confidence bands for significance level  $\alpha = 0.1$ . **D.** Restricted image resolution and 3-dimensional rotation of particle arrangements lead to variability in the observed colocalization thresholds: Simulation study of 100 images only containing one triplet with pairwise distances set to 70 nm = 2.8 pixels per image (100% complete labeling efficiency, see Section 4.4).

640 nm are recorded, in channel B, stainings with Alexa 488 and in channel C, stainings with Alexa 594. Note, however, that the exact numbers of nanorulers within a recorded STED image is unknown. Due to misfolding and clumping of nanorulers and different nanoruler immobilization rates for each STED image one cannot compute a fixed unit of nanorulers per microscopy image and experiment.

The results of the colocalization analysis for all three settings (with default MultiMatch Mode I) are shown in Figure 4 via relative abundance curves with standard deviation bands quantifying variation across images within the same setting. Here, we used MultiMatch Mode I and included the analysis with Mode II showing comparable results, but slightly underestimating the number of triplets in Setting 3, in Supplementary Material D, Figure D4.

For Setting 1 we can appreciate that, as expected, across a range of  $t$  values only a few pairs and triplets are detected (Figure 4A). The rise of relative abundance curves is unavoidable for large  $t$ , since the probability increases that randomly scattered particles are matched. In Setting 2, despite experimental variation, we clearly recover all supplied nanoruler structures. Even

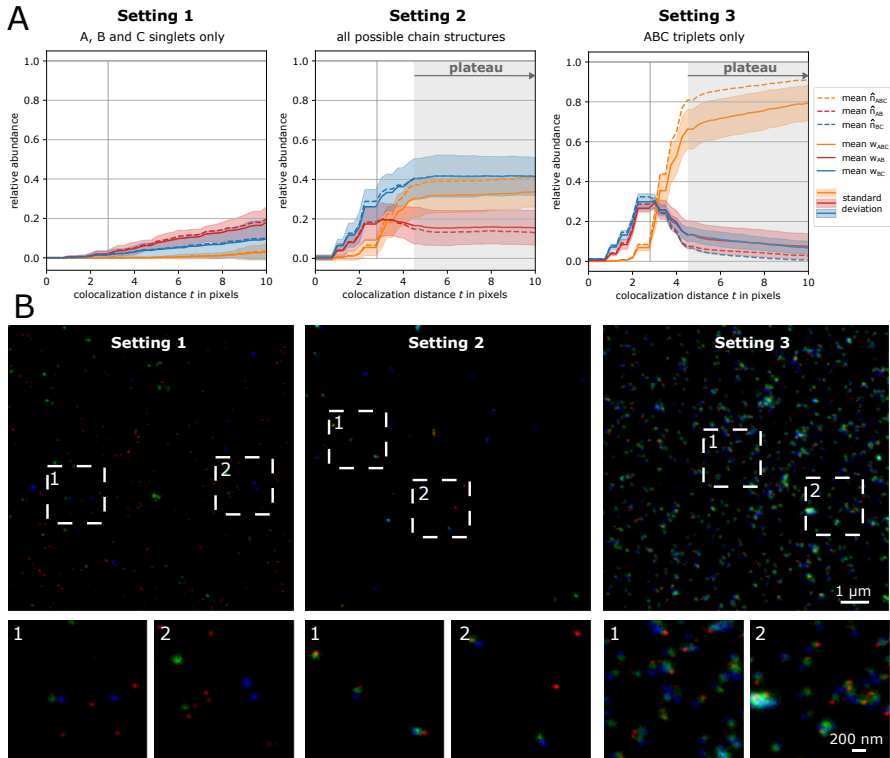

**Fig. 4 MultiMatch Mode I relative abundance curves  $w(t)$  for experimental STED images.** For each setting the solid curves are mean relative abundances with standard deviation bands across a range of colocalization threshold  $t$  from 0 to 10 pixels (25 nm = 1pixel). The abundances are scaled by the total number of points detected in channel B. Additionally, incomplete labeling efficiency (90% in each channel) corrected abundances are plotted as dotted curves. The true colocalization distance of 70 nm within nanoruler structures is depicted as vertical line. **A. Setting 1:** Mean abundance curves for only singlets consistently show the expected 0% relative triplet and pair abundances. **Setting 2:** Triplets, pairs, and singlet nanoruler are detected with stable abundances for approximately  $t \geq 4$  pixels. **Setting 3:** Mean abundance curves for analyzing the triplet nanoruler solution only. The incorporation of incomplete labeling efficiency clearly corrects the relative triplet abundance towards the in this setup expected 100%. **B.** Representative STED images for Settings 1,2 and 3 with image details.

416 more, colocalization curves are still stabilizing for a colocalization threshold  $t$   
 417 greater than approximately 4 pixels (= 100 nm): For  $t > 100$  nm ABC triplets  
 418 are approximately detected with relative abundance of 0.32, AB pairs with  
 419 0.16 and BC pairs with 0.42 relative abundance, yielding a relative amount  
 420 of 0.1 unmatched B singlets. The relative abundance curves of all structures  
 421 reach a plateau at approximately  $t \geq 4$  pixels (= 100 nm), i.e., the slope of  
 422 all curves within the same setting decreases rapidly. In Setting 3, as expected,  
 423 the relative abundances of AB and BC pairs converge to zero while triplets  
 424 are the dominantly detected structure for  $t \geq 4$  pixels.

Notably, in Settings 2 and 3 stable abundance curves are reached at around 100 nm, which is 30 nm more than the experimentally fixed, maximal distance between neighboring fluorophore spots in the nanoruler structures. This effect can be explained by the still limited resolution in the microscopy image and can be reproduced via simulation: We simulated 100 STED images containing only one triplet ( $n_{ABC} = 1$ ) in Figure 3D and can reproduce this stabilizing behavior of abundance curves in Figure 2.

Limited resolution alone does not explain why 20%–30% of detected B particles (for  $t \geq 5$  pixels) are not matched to a triplet in Setting 3: The attachment of a single fluorophore to a nanoruler spot is expected to have a success probability of 85% to 90% and hence at least one fluorophore should be attached to each spot in almost 100% of all cases. Still, due to the above described experimental variation in nanoruler imaging and additional errors in point detection, especially due to nanoruler clumping, the overall success rate of fluorophore spot detection is incomplete. Hence, we erroneously detect pairs instead of triplets or singlets due to noise. As in Setting 1 those artifacts will be matched into triplets for large enough  $t$ .

For simplicity, we model a 90% labeling efficiency across all three-color channels in the experimental STED setup. The estimated abundance curves  $\hat{n}(t)$  (dotted lines in Figure 4), in Setting 3 visibly correct the measurements towards the expected relative abundances. Additional confidence bands around  $\hat{n}$  allow to infer on the robustness of the abundance estimation as presented in (Figure 3C) for one of the experimental STED images of Setting 3.

## 2.5 Evaluation of Simulated Four-Color STED Images

MultiMatch is applicable to an arbitrary number of color channels, which we showcase in the following with an adapted simulation setup for quadruples, triplets, pairs, and singlets in simulated four-color STED microscopy images. In contrast to the simulation study in Section 2.2, we additionally challenged our MultiMatch tool with an increased noise level and by allowing arbitrarily curled chain structures (see simulation setup in Section 4.4). In Figure 5 we show the colocalization analysis results of two simulation scenarios:

**Scenario I:** We simulated 50 ABCD quadruples, 30 ABC triplets, 20 AB pairs and 30 C and D singlets, respectively, to mimic a chain-like molecule being split at loci C and D.

**Scenario II:** We simulated 100 ABCD quadruples and no triplets, pairs nor singlets

Three additional simulations setups are shown in Supplementary Material E.3 and analysis results are plotted in Figure E7. For each scenario we simulated 100 images with full labeling efficiencies ( $s_A = s_B = s_C = s_D = 1$ ) and 100 images with incomplete labeling efficiencies ( $s_A = s_B = s_C = s_D = 0.95$ ) by randomly deleting 5% of points simulated in the prior, full labeling efficiency simulation in each channel.

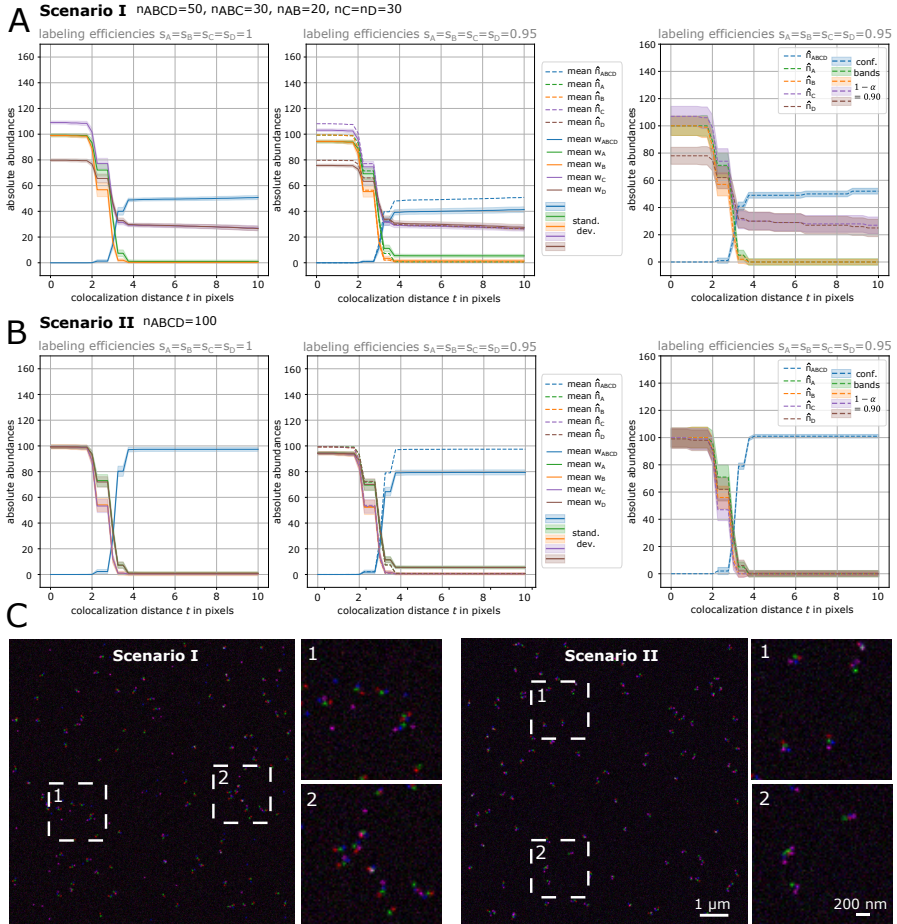

**Fig. 5 MultiMatch Mode II abundance curves  $w(t)$  and estimation results  $\hat{n}(t)$  for simulated four-colour STED images. *Scenario I*: A mixture of ABCD quadruplets, ABC triplets, AB pairs and C,D singlets were simulated. *Scenario II*: Only ABCD quadruplets were simulated. **A**. For each scenario images with complete labeling efficiency (left) and with incomplete labeling efficiency (middle) were simulated. Solid curves are mean absolute detected abundances with standard deviation bands across a range of colocalization thresholds  $t$  from 0 to 10 pixels (25 nm = 1pixel). All curves stabilize at approximately  $t = 4$  pixel close to the true simulated number of structures. For images with incomplete labeling efficiency (95% in each channel) uncorrected detected abundances plus standard deviation bands are plotted as solid curves showing consistent underestimation of quadruplets. Corrected abundances are plotted as dotted curves recovering the true number of simulated structures. For one exemplary STED image simulated with incomplete labeling efficiency, corrected abundance curves and corresponding confidence bands are shown (right). **B**. Representative STED images for Scenarios I and Scenario II with image details.**

467

468

For this analysis we applied MultiMatch Mode II, i.e., allowing the detection of both ABC as well as BCD triplets and AB, BC and CD pairs without



any prioritization order of chain structures. Again, also in the case of four-color images, we can appreciate that MultiMatch consistently recovers true abundances of quadruplets in case of full labeling efficiencies. Absolute abundance curves, as also described in the analysis of our experimental dataset in Figure 4, stabilize for approximately  $t = 4$  pixels. For images simulated with incomplete labeling efficiencies, the colocalization curves show underestimation of quadruplets as expected. With our statistical framework we again can visibly correct the colocalization curves towards the true, simulated structures abundances and additionally gain confidence bands confirming the stability of our estimator.

For denser distributions, as shown in Supplementary Material E.3, Fig.E7 B-D, we can observe that 1. MultiMatch II misses quadruples for the sake of closer particle pairs, and 2. similar to the experimental nanoruler analysis depends on the performance of the point detection and hence the noise level in the microscopy image. If consistent noise challenges the point detection, abundance curves still stabilize, but the plateau shows a smaller number of matched quadruples than simulated in absolute numbers. Hence, we advise user of MultiMatch to check the noise level of the microscopy image and the point detection result with the interactive napari viewer (Figure 1D and Supplementary Material E.3, Fig E7 D) and if necessary evaluate channel-wise scaled, relative instead of absolute abundances.

### 3 Discussion

In this article we introduce multi-marginal optimal unbalanced transport methodology for geometry-informed, multi-color colocalization analysis. We are able to show, that for the analysis of more than two color channels, it is crucial to take into account the colocalization geometry of the biological complex.

By either choosing chain-costs in a multi-marginal OT problem (Mode I) or coupling consecutive two-marginal OT matchings (Mode II), MultiMatch successfully detects  $k$ -chain particle assemblies such as quadruples, triplets, pairs, and singlets, as they appear when staining multiple loci on chain-like molecules like DNA or RNA strands. Both modes have their advantages, which depend on the number of particles imaged and prior knowledge on the biological context: Mode I is best for detecting one chain structure of choice and is more robust in dense particle distributions. When the particle distribution is sparser and multiple chain structures in the imaged biological setting are of interest, Mode II is suited to detect them without any predefined prioritization order.

Since often the true colocalization distance is unknown, MultiMatch results can be output as structure-wise relative or absolute abundance curves across a range of colocalization thresholds  $t$ . In our simulation studies as well as our experimental settings we could show, that output curves stabilize close to ground truth abundances.

511 However, as for all object-based colocalization methods, the performance  
512 MultiMatch scales with the noise level of the microscopy image, the perfor-  
513 mance of the object detection and the resolution of the microscopy. Abundance  
514 curve plateaus can be less clear in case the microscopy image contains detected  
515 singlets of different particles types. In this case, the larger  $t$ , the more far away  
516 singlets are matched. In such cases it might be unclear, whether singlets truly  
517 exist in the biological sample or whether they are an artifact of the experi-  
518 ment and image processing. For such cases, we advise to observe the quality  
519 of the microscopy image with the MultiMatch compatible, interactive napari  
520 viewer.

521 Our network flow implementation significantly decreases computational  
522 costs compared to standard approaches solving comparable OT problems and  
523 comparable colocalization tools (Section 4.3, Supplementary Material A.2 and  
524 E.1). The simulation studies show that as soon as we have prior knowledge  
525 on the chain colocalization geometry, MultiMatch, in contrast to other triplet  
526 colocalization methods, is robust against overestimation of triplets with chain  
527 geometry since it only considers one-to-one interactions. MultiMatch is also  
528 tested on experimental STED images of different nanoruler combinations and  
529 can correct structure abundances for predefined incomplete labeling efficien-  
530 cies and point detection errors, where confidence bands allow further inference  
531 on the estimated abundances.

532 All experimental studies have been performed for  $k = 3$  color channels.  
533 However, in many scientific fields the detection of  $k$ -chains for larger  $k$  is of  
534 interest. The mathematical and statistical frameworks allow straight-forward  
535 generalization (Details in Supplementary Material A.1) and we exemplarily  
536 show successful detection results for simulated four-color STED images. With  
537 current technical standards, the experimental setup of multi-color nanoscopy  
538 imaging is still challenging, costly and time consuming, but in view of further  
539 technological improvements our algorithm is already applicable for the evalu-  
540 ation of this type of experimental setups, and especially promising in view of  
541 recent developments in super-resolution microscopy with a resolution of a few  
542 nanometers and below (Balzarotti et al, 2017; Gwosch et al, 2020).

543 In the same way channel specific colocalization thresholds as  $t_{AB}$ ,  $t_{BC}$  and  
544  $t_{CD}$  can be considered within the OT problem. Although we only present the  
545 evaluation of 2D STED images with constant labeling efficiencies across chan-  
546 nels, our software package can directly be applied to multi-color 3D microscopy  
547 images with channel-specific labeling efficiencies.

548 Limitations: If the microscopy image shows especially dense point clouds,  
549 MultiMatch necessarily will have difficulties in differentiating between random  
550 and biological reasonable proximity. Note, however, that this is not a specific  
551 weakness of MultiMatch, but any other method will face this identifiability  
552 problem, which is caused by missing linkage information. It can only be over-  
553 come with additional prior information of the underlying biological sample.  
554 However, MultiMatch Mode I is especially robust against dense particle dis-  
555 tribution in comparison to pairwise matching approaches as implemented in

556 MultiMatch Mode II or greedy Nearest Neighbor Matchings. An adaption to  
557 tree like particle arrangements and the inclusion of additional constraints, e.g.,  
558 incorporating regions of interest are future research objectives.

## 559 4 Methods

### 560 4.1 Point Detection

561 In order to locate the positions of the particles in STED images, we perform  
562 point detection via the Python package scikit-image (Walt et al, 2014) (ver-  
563 sion 0.19.1). This is provided as an optional analysis step in our MultiMatch  
564 implementation for the evaluation of intensity matrices.

### 565 4.2 Interactive Napari Viewer

566 Multi-color microscopy images, point detection results and MultiMatch output  
567 can be loaded into the interactive napari viewer. MultiMatch is compatible  
568 with Python package napari (napari contributors, 2019) (version 0.4.18) and an  
569 exemplary use-case is described on our repository [https://github.com/gnies/  
570 multi\\_match](https://github.com/gnies/multi_match).

### 571 4.3 Network Flow Implementation

572 We utilize the minimum-cost flow solver provided in the package ortools (ver-  
573 sion 9.4.1874) (Perron and Furnon, 2019). For an image containing around  
574 1,000 points in each color channel, a solution of the min cost flow problem can  
575 be computed for about 10 different values of  $t$  in around 1 seconds on a stan-  
576 dard laptop. Details on the network architecture and its numerical complexity  
577 are given in Supplementary Material A.2.

### 578 4.4 Simulation Study Setup

579 In the simulation study discussed in Section 2.2 a predefined number of triplets,  
580 pairs, and singlets are generated as follows:

581 **Step 1:** Draw the coordinate for channel B as  $b \sim \mathcal{U}([0, 400 \cdot r]^2)$ , where  $\mathcal{U}$   
582 is the continuous uniform distribution.

583 **Step 2a:** Draw angle  $\alpha \sim \mathcal{U}[0, 2\pi]$  and normally distributed distance  $d_A \sim$   
584  $\mathcal{N}(t, 0.5)$ . Set  $a = b(\cos(\alpha)d_A + \sin(\alpha)d_A)$ .

585 **Step 2b:** Draw  $\epsilon \sim \mathcal{N}(0, 0.2)$  and set angle  $\beta = \alpha + \pi + \epsilon$ . Draw  $d_C \sim$   
586  $\mathcal{N}(t, 0.5)$  and set  $c = b(\cos(\beta)d_C + \sin(\beta)d_C)$ .

587 **Step 3:** Round  $a, b$  and  $c$  to match the pixel grid  $[0, 400]^2 \subseteq \mathbb{N}_{\geq 0}^2$ .

588 This design favors to simulate triplets of an approximately linear structure.  
589 Pairs are simulated by skipping either Step 2a or 2b. Singlets are drawn as in  
590 Step 1.

591 For Section 2.5, quadruples, triplets, pairs, and singlets  $\mathbf{n}$  are generated  
592 similarly, but replacing and adding

593 **Step 2b:** Draw angle  $\beta \sim \mathcal{U}[0, 2\pi]$  and  $d_C \sim \mathcal{N}(t, 0.5)$  and set  $d =$   
594  $b(\cos(\beta)d_C + \sin(\beta)d_C)$ .

595 **Step 2c:** Draw angle  $\gamma \sim \mathcal{U}[0, 2\pi]$  and  $d_D \sim \mathcal{N}(t, 0.5)$  and set  $d =$   
596  $c(\cos(\gamma)d_D + \sin(\gamma)d_D)$ .

597 This simulation setup allows arbitrarily curved chain-structures. The distance  
598 threshold is always fixed to  $t = 70$  nm.

599 To obtain intensity images close to an experimental STED setup from the  
600 simulated point sets we followed the simulation setup introduced in [Tamelung  
601 et al \(2021\)](#), to mimic experimental STED images of  $400 \times 400$  pixels with  
602 full-width at half-maximum (FWHM) value of 40 nm (approximately the reso-  
603 lution of the STED microscope) and pixel size  $25 \text{ nm} = 1 \text{ pixel}$ . In the second  
604 simulation study in Section 2.5 the Poisson noise level was on average increased  
605 by a factor of 10.

## 606 4.5 Methods Included in the Simulation Study

607 For the Ripley’s K based Statistical Object Distance Analysis (SODA, [Lagache  
608 et al, 2018](#)) we used the triplet colocalization protocol SODA 3 Colors in ICY  
609 (version 2.4.0.0, [de Chaumont et al, 2012](#)). For the analysis we used default  
610 input parameters and set scale threshold per channel to be 100. The plugin  
611 BlobProb ([Fletcher et al, 2010](#)) was called in ImageJ/Fiji (version 2.3.0/1.53q,  
612 [Schindelin et al, 2012](#)) and the number of colocalized blobs were considered.  
613 We set voxel size to 25 nm in every dimension and the threshold per channel  
614 to 100. The ConditionalColoc ([Vega-Lugo et al, 2022](#)) from GitHub ([https://  
615 github.com/kjaqaman/ConditionalColoc](https://github.com/kjaqaman/ConditionalColoc)) was executed on MATLAB (version  
616 R2023a). Particles were detected using the “point-source detection” algorithm  
617 provided via the integrated u-track package ([619 For all implementations but ConditionalColoc the detected chain-structure  
620 abundances were output as integers. Therefore, we scaled abundances, i.e.,  
621 divided them by the total number of particles detected in channel B. Con-  
622 ditionColoc already aims to output probabilities that are scaled by detected  
623 particles per channel, hence no further transformation of the output was per-  
624 formed by us. Since for all simulated Scenarios the same number of particles  
625 was generated in every channel, we ensured that both scaling procedures are  
626 comparable. The maximal colocalization threshold is set to  \$t = 5\$  pixels = 125  
627 nm throughout all considered methods.](https://github.com/DanuserLab/<br/>618 u-track</a>).</p></div><div data-bbox=)

## 628 4.6 Nanoruler Samples

629 Custom-made DNA nanoruler samples featuring one, two, or three fluorophore  
630 spots, each consisting of 20 fluorophores (Alexa Fluor488, Alexa Fluor594,  
631 Star Red), with a distance between the spots of 70 nm, were purchased from  
632 Gattaquant - DNA Nanotechnologies (Gräfelfing, Germany). The biotinylated  
633 nanorulers were immobilized on a BSA-biotin-neutravidin surface according to  
634 the manufacturer’s specifications.

## 4.7 Stimulated Emission Depletion (STED) Super-Resolution Light Microscopy

Image acquisition was done using a quad scanning STED microscope (Abberior Instruments, Göttingen, Germany) equipped with a UPlanSApo 100x/1,40 Oil objective (Olympus, Tokyo, Japan). Excitation of Alexa Fluor 488, Alexa Fluor 594 and Star Red was achieved by laser beams featuring wave lengths of 485 nm, 561 nm and 640 nm nm respectively. For STED imaging, a laser beam with an emission wavelength of 775 nm was applied. For all images, a pixel size of 25 nm was utilized. Except for contrast stretching and increase of image brightness, no further image processing was applied.

## 4.8 Data and Code Availability

The Python package MultiMatch is available on GitHub repository [https://github.com/gnies/multi\\_match](https://github.com/gnies/multi_match). Code and data to create the main and supplementary figures can be accessed via Zenodo archive <https://doi.org/10.5281/zenodo.7221879>. Scripts were implemented in R (version 4.1.0) and Python (version 3.8.5).

**Supplementary Material.** Theoretical framework of the multi-marginal optimal unbalanced transport matching with chain costs and formulation as network flow (Supplementary Material A), statistical inference on labeling efficiencies (Supplementary Material B), comments on the output from our usage of ConditionalColoc (Supplementary Material C), output of MultiMatch Mode II on the experimental STED images (Supplementary Material D), and additional analysis and simulations scenarios for three-color images and four-color images (Supplementary Material E).

**Acknowledgments.** We would like to thank Leo Lehmann for his help in software implementation, Jan-Niklas Dohrke for the graphic illustration of the nanorulers in Figure 1C, and Christiane Elgert and Arndt von Haeseler for constructive criticism on the manuscript. J.N. is supported by the Austrian Science Fund (FWF) project number F78 to Arndt von Haeseler. This work was supported by the European Research Council (ERC AdG no. 835102) (to S.J.). G.N., H.L., S.J. and A.M. are supported by the Deutsche Forschungsgemeinschaft (DFG, German Research Foundation) under Germany's Excellence Strategy-EXC 2067/1-390729940 and H.L., B.S., S.J. and A.M. by the DFG CRC 1456 "Mathematics of Experiment" (Project Number B04, C06).

## References

- 669
- 670 Adler J, Parmryd I (2010) Quantifying colocalization by correlation: The Pear-  
671 son correlation coefficient is superior to the Mander's overlap coefficient.  
672 *Cytometry Part A* 77A(8):733–742. <https://doi.org/10.1002/cyto.a.20896>
- 673 Andronov L, Genthial R, Hentsch D, et al (2022) splitSMLM, a spectral demix-  
674 ing method for high-precision multi-color localization microscopy applied  
675 to nuclear pore complexes. *Communications Biology* 5(1):1–13. <https://doi.org/10.1038/s42003-022-04040-1>
- 676
- 677 Balzarotti F, Eilers Y, Gwosch KC, et al (2017) Nanometer resolution imaging  
678 and tracking of fluorescent molecules with minimal photon fluxes. *Science*  
679 355(6325):606–612. <https://doi.org/10.1126/science.aak9913>
- 680 Beater S, Holzmeister P, Lalkens B, et al (2015) Simple and aberration-  
681 free 4color-STED - multiplexing by transient binding. *Optics Express*  
682 23(7):8630–8638. <https://doi.org/10.1364/OE.23.008630>
- 683 Beier F, von Lindheim J, Neumayer S, et al (2022) Unbalanced multi-marginal  
684 optimal transport. *Journal of Mathematical Imaging and Vision* <https://doi.org/10.1007/s10851-022-01126-7>
- 685
- 686 Betzig E, Patterson GH, Sougrat R, et al (2006) Imaging intracellular fluo-  
687 rescent proteins at nanometer resolution. *Science* 313(5793):1642–1645.  
688 <https://doi.org/10.1126/science.1127344>
- 689 Boettiger AN, Bintu B, Moffitt JR, et al (2016) Super-resolution imaging  
690 reveals distinct chromatin folding for different epigenetic states. *Nature*  
691 529(7586):418–422. <https://doi.org/10.1038/nature16496>
- 692 Butkevich AN, Weber M, Cereceda Delgado AR, et al (2021) Photoactivatable  
693 fluorescent dyes with hydrophilic caging groups and their use in multicolor  
694 nanoscopy. *Journal of the American Chemical Society* 143(44):18,388–  
695 18,393. <https://doi.org/10.1021/jacs.1c09999>
- 696 Cainero I, Cerutti E, Faretta M, et al (2021) Measuring nanoscale distances by  
697 structured illumination microscopy and image cross-correlation spectroscopy  
698 (SIM-ICCS). *Sensors* 21(6):2010. <https://doi.org/10.3390/s21062010>
- 699 Chari V, Lacoste-Julien S, Laptev I, et al (2015) On Pairwise Costs for  
700 Network Flow Multi-Object Tracking. <https://doi.org/10.48550/arXiv.1408.3304>,  
701 URL <http://arxiv.org/abs/1408.3304>, arXiv:1408.3304 [cs, math]
- 702 de Chaumont F, Dallongeville S, Chenouard N, et al (2012) Icy: an open  
703 bioimage informatics platform for extended reproducible research. *Nature*  
704 *Methods* 9(7):690–696. <https://doi.org/10.1038/nmeth.2075>

- 705 Chizat L, Peyré G, Schmitzer B, et al (2018) Unbalanced optimal transport:  
706 Dynamic and Kantorovich formulations. *Journal of Functional Analysis*  
707 274(11):3090–3123. <https://doi.org/10.1016/j.jfa.2018.03.008>
- 708 napari contributors (2019) napari: a multi-dimensional image viewer for  
709 python. URL <https://doi.org/10.5281/zenodo.8115575>
- 710 Costa R, Rodia MT, Zini N, et al (2021) Morphological study of TNPO3  
711 and SRSF1 interaction during myogenesis by combining confocal, structured  
712 illumination and electron microscopy analysis. *Molecular and Cellular Bio-*  
713 *chemistry* 476(4):1797–1811. <https://doi.org/10.1007/s11010-020-04023-y>
- 714 Fletcher PA, Scriven DRL, Schulson MN, et al (2010) Multi-image colocal-  
715 ization and its statistical significance. *Biophysical Journal* 99(6):1996–2005.  
716 <https://doi.org/10.1016/j.bpj.2010.07.006>
- 717 Friesecke G, Matthes D, Schmitzer B (2021) Barycenters for the Hellinger–  
718 Kantorovich Distance Over  $\mathbb{R}^d$ . *SIAM Journal on Mathemat-*  
719 *ical Analysis* 53(1):62–110. <https://doi.org/10.1137/20M1315555>
- 720 Glogger M, Wang D, Kompa J, et al (2022) Synergizing exchangeable fluo-  
721 rophore labels for multitarget STED microscopy. *ACS Nano* 16(11):17,991–  
722 17,997. <https://doi.org/10.1021/acsnano.2c07212>
- 723 Gonzalez Pisfil M, Nadelson I, Bergner B, et al (2022) Stimulated emission  
724 depletion microscopy with a single depletion laser using five fluorochromes  
725 and fluorescence lifetime phasor separation. *Scientific Reports* 12(1):14,027.  
726 <https://doi.org/10.1038/s41598-022-17825-5>
- 727 Goucher DR, Wincovitch SM, Garfield SH, et al (2005) A quantitative determi-  
728 nation of multi-protein interactions by the analysis of confocal images using  
729 a pixel-by-pixel assessment algorithm. *Bioinformatics* 21(15):3248–3254.  
730 <https://doi.org/10.1093/bioinformatics/bti531>
- 731 Gwosch KC, Pape JK, Balzarotti F, et al (2020) MINFLUX nanoscopy delivers  
732 3D multicolor nanometer resolution in cells. *Nature Methods* 17(2):217–224.  
733 <https://doi.org/10.1038/s41592-019-0688-0>
- 734 Haas KT, Peaucelle A (2021) Protocol for multicolor three-dimensional  
735 dSTORM data analysis using MATLAB-based script package Grafeo. *STAR*  
736 *Protocols* 2(3):100,808. <https://doi.org/10.1016/j.xpro.2021.100808>
- 737 Heinemann F, Klatt M, Munk A (2022) Kantorovich–Rubinstein Distance  
738 and Barycenter for Finitely Supported Measures: Foundations and Algo-  
739 rithms. *Applied Mathematics & Optimization* 87(1):4. [https://doi.org/10.](https://doi.org/10.1007/s00245-022-09911-x)  
740 [1007/s00245-022-09911-x](https://doi.org/10.1007/s00245-022-09911-x)



- 741 Hell SW (2007) Far-field optical nanoscopy. *Science* 316(5828):1153–1158.  
742 <https://doi.org/10.1126/science.1137395>
- 743 Hell SW, Wichmann J (1994) Breaking the diffraction resolution limit by  
744 stimulated emission: stimulated-emission-depletion fluorescence microscopy.  
745 *Optics Letters* 19(11):780–782. <https://doi.org/10.1364/OL.19.000780>
- 746 Hess ST, Girirajan TPK, Mason MD (2006) Ultra-high resolution imaging  
747 by fluorescence photoactivation localization microscopy. *Biophysical Journal*  
748 91(11):4258–4272. <https://doi.org/10.1529/biophysj.106.091116>
- 749 Hummert J, Tashev SA, Herten DP (2021) An update on molecular counting  
750 in fluorescence microscopy. *The International Journal of Biochemistry &*  
751 *Cell Biology* 135:105,978. <https://doi.org/10.1016/j.biocel.2021.105978>
- 752 Humpert F, Yahiatène I, Lummer M, et al (2015) Quantifying molecular  
753 colocalization in live cell fluorescence microscopy. *Journal of Biophotonics*  
754 8(1-2):124–132. <https://doi.org/10.1002/jbio.201300146>
- 755 Jaqaman K, Loerke D, Mettlen M, et al (2008) Robust single-particle tracking  
756 in live-cell time-lapse sequences. *Nature Methods* 5(8):695–702. <https://doi.org/10.1038/nmeth.1237>  
757
- 758 Kim YH, Pass B (2014) A general condition for monge solutions in the  
759 multi-marginal optimal transport problem. *SIAM Journal on Mathematical*  
760 *Analysis* 46(2):1538–1550. <https://doi.org/10.1137/130930443>
- 761 Klar TA, Jakobs S, Dyba M, et al (2000) Fluorescence microscopy with diffrac-  
762 tion resolution barrier broken by stimulated emission. *Proceedings of the*  
763 *National Academy of Sciences* 97(15):8206–8210. [https://doi.org/10.1073/](https://doi.org/10.1073/pnas.97.15.8206)  
764 [pnas.97.15.8206](https://doi.org/10.1073/pnas.97.15.8206)
- 765 Lagache T, Grassart A, Dallongeville S, et al (2018) Mapping molecular assem-  
766 blies with fluorescence microscopy and object-based spatial statistics. *Nature*  
767 *Communications* 9(1):698. <https://doi.org/10.1038/s41467-018-03053-x>
- 768 Le K, Nguyen H, Nguyen K, et al (2022) On multimarginal partial optimal  
769 transport: equivalent forms and computational complexity. In: *Proceedings*  
770 *of The 25th International Conference on Artificial Intelligence and Statistics*.  
771 PMLR, pp 4397–4413
- 772 Lin T, Ho N, Cuturi M, et al (2022) On the Complexity of Approxim-  
773 ating Multimarginal Optimal Transport. [https://doi.org/10.48550/arXiv.](https://doi.org/10.48550/arXiv.1910.00152)  
774 [1910.00152](https://doi.org/10.48550/arXiv.1910.00152)
- 775 Malkusch S, Endesfelder U, Mondry J, et al (2012) Coordinate-based  
776 colocalization analysis of single-molecule localization microscopy data.

- 777 Histochemistry and Cell Biology 137(1):1–10. <https://doi.org/10.1007/s00418-011-0880-5>  
778
- 779 Manders EMM, Verbeek FJ, Aten JA (1993) Measurement of co-localization  
780 of objects in dual-colour confocal images. Journal of Microscopy 169(3):375–  
781 382. <https://doi.org/10.1111/j.1365-2818.1993.tb03313.x>
- 782 Miron E, Oldenkamp R, Brown JM, et al (2020) Chromatin arranges in chains  
783 of mesoscale domains with nanoscale functional topography independent of  
784 cohesin. Science Advances 6(39):eaba8811. <https://doi.org/10.1126/sciadv.aba8811>  
785
- 786 Mukherjee S, Gonzalez-Gomez C, Danglot L, et al (2020) Generalizing the  
787 statistical analysis of objects’ spatial coupling in bioimaging. IEEE Sig-  
788 nal Processing Letters 27:1085–1089. <https://doi.org/10.1109/LSP.2020.3003821>  
789
- 790 Panaretos VM, Zemel Y (2019) Statistical aspects of Wasserstein distances.  
791 Annual Review of Statistics and Its Application 6(1):405–431. <https://doi.org/10.1146/annurev-statistics-030718-104938>  
792
- 793 Pass B (2015) Multi-marginal optimal transport: theory and applications.  
794 ESAIM: Mathematical Modelling and Numerical Analysis 49(6):1771–1790.  
795 <https://doi.org/10.1051/m2an/2015020>
- 796 Perron L, Furnon V (2019) OR-tools. URL <https://developers.google.com/optimization/>  
797
- 798 Peyré G, Cuturi M (2020) Computational optimal transport. URL <http://arxiv.org/abs/1803.00567>  
799
- 800 Reinhardt SCM, Masullo LA, Baudrexel I, et al (2023) Ångström-resolution  
801 fluorescence microscopy. Nature 617(7962):711–716. <https://doi.org/10.1038/s41586-023-05925-9>  
802
- 803 Ripley BD (1976) The second-order analysis of stationary point processes.  
804 Journal of Applied Probability 13(2):255–266. <https://doi.org/10.2307/3212829>  
805
- 806 Rothmund PWK (2006) Folding DNA to create nanoscale shapes and  
807 patterns. Nature 440(7082):297–302. <https://doi.org/10.1038/nature04586>
- 808 Rust MJ, Bates M, Zhuang X (2006) Sub-diffraction-limit imaging by  
809 stochastic optical reconstruction microscopy (STORM). Nature Methods  
810 3(10):793–796. <https://doi.org/10.1038/nmeth929>

- 811 Saal KA, Shaib AH, Mougios N, et al (2023) Heat denaturation enables multi-  
812 color X10-STED microscopy. *Scientific Reports* 13(1):5366. [https://doi.org/](https://doi.org/10.1038/s41598-023-32524-5)  
813 [10.1038/s41598-023-32524-5](https://doi.org/10.1038/s41598-023-32524-5)
- 814 Sahl SJ, Hell SW, Jakobs S (2017) Fluorescence nanoscopy in cell biology.  
815 *Nature Reviews Molecular Cell Biology* 18(11):685–701. [https://doi.org/10.](https://doi.org/10.1038/nrm.2017.71)  
816 [1038/nrm.2017.71](https://doi.org/10.1038/nrm.2017.71)
- 817 Sastre D, Estadella I, Bosch M, et al (2019) Triple-colocalization approach  
818 to assess traffic patterns and their modulation. In: *Computer Opti-*  
819 *mized Microscopy: Methods and Protocols. Methods in Molecular Biology,*  
820 *Springer, New York, NY, p 215–233*
- 821 Schindelin J, Arganda-Carreras I, Frise E, et al (2012) Fiji: an open-source  
822 platform for biological-image analysis. *Nature Methods* 9(7):676–682. [https:](https://doi.org/10.1038/nmeth.2019)  
823 [//doi.org/10.1038/nmeth.2019](https://doi.org/10.1038/nmeth.2019)
- 824 Schmied JJ, Gietl A, Holzmeister P, et al (2012) Fluorescence and super-  
825 resolution standards based on DNA origami. *Nature Methods* 9(12):1133–  
826 1134. <https://doi.org/10.1038/nmeth.2254>
- 827 Schmied JJ, Raab M, Forthmann C, et al (2014) DNA origami–based standards  
828 for quantitative fluorescence microscopy. *Nature Protocols* 9(6):1367–1391.  
829 <https://doi.org/10.1038/nprot.2014.079>
- 830 Schuler S, Vernaza P, Choi W, et al (2017) Deep Network Flow for Multi-  
831 object Tracking. In: *2017 IEEE Conference on Computer Vision and Pattern*  
832 *Recognition (CVPR)*, pp 2730–2739, [https://doi.org/10.1109/CVPR.2017.](https://doi.org/10.1109/CVPR.2017.292)  
833 [292](https://doi.org/10.1109/CVPR.2017.292)
- 834 Shimizu Y, Takagi J, Ito E, et al (2021) Cargo sorting zones in the trans-Golgi  
835 network visualized by super-resolution confocal live imaging microscopy  
836 in plants. *Nature Communications* 12(1):1901. [https://doi.org/10.1038/](https://doi.org/10.1038/s41467-021-22267-0)  
837 [s41467-021-22267-0](https://doi.org/10.1038/s41467-021-22267-0)
- 838 Smallcombe A (2001) Multicolor imaging: The important question of  
839 co-localization. *BioTechniques* 30(6):1240–1246. [https://doi.org/10.2144/](https://doi.org/10.2144/01306bt01)  
840 [01306bt01](https://doi.org/10.2144/01306bt01)
- 841 Spahn C, Grimm JB, Lavis LD, et al (2019) Whole-Cell, 3D, and Multicolor  
842 STED Imaging with Exchangeable Fluorophores. *Nano Letters* 19(1):500–  
843 505. <https://doi.org/10.1021/acs.nanolett.8b04385>
- 844 Tameling C, Stoldt S, Stephan T, et al (2021) Colocalization for super-  
845 resolution microscopy via optimal transport. *Nature Computational Science*  
846 1(3):199–211. <https://doi.org/10.1038/s43588-021-00050-x>

- 847 Unterauer EM, Boushehri SS, Jevdokimenko K, et al (2023) Spatial proteomics  
848 in neurons at single-protein resolution. [https://doi.org/10.1101/2023.05.17.](https://doi.org/10.1101/2023.05.17.541210)  
849 [541210](https://doi.org/10.1101/2023.05.17.541210)
- 850 Vega-Lugo J, da Rocha-Azevedo B, Dasgupta A, et al (2022) Analysis of condi-  
851 tional colocalization relationships and hierarchies in three-color microscopy  
852 images. *Journal of Cell Biology* 221(7):e202106,129. [https://doi.org/10.](https://doi.org/10.1083/jcb.202106129)  
853 [1083/jcb.202106129](https://doi.org/10.1083/jcb.202106129)
- 854 Villani C (2009) *Optimal transport*. Springer Berlin, Heidelberg, URL [https:](https://link.springer.com/book/10.1007/978-3-540-71050-9)  
855 [//link.springer.com/book/10.1007/978-3-540-71050-9](https://link.springer.com/book/10.1007/978-3-540-71050-9)
- 856 Walt Svd, Schönberger JL, Nunez-Iglesias J, et al (2014) scikit-image: image  
857 processing in Python. *PeerJ* 2:e453. <https://doi.org/10.7717/peerj.453>
- 858 Wang J, Fan Y, Sanger JM, et al (2022) STED analysis reveals the organization  
859 of nonmuscle muscle II, muscle myosin II, and F-actin in nascent myofibrils.  
860 *Cytoskeleton* 79(12):122–132. <https://doi.org/10.1002/cm.21729>
- 861 Wang S, Arena ET, Becker JT, et al (2019) Spatially adaptive colocalization  
862 analysis in dual-color fluorescence microscopy. *IEEE Transactions on Image*  
863 *Processing* 28(9):4471–4485. <https://doi.org/10.1109/TIP.2019.2909194>
- 864 Willig KI, Rizzoli SO, Westphal V, et al (2006) STED microscopy reveals that  
865 synaptotagmin remains clustered after synaptic vesicle exocytosis. *Nature*  
866 440(7086):935–939. <https://doi.org/10.1038/nature04592>
- 867 Winter FR, Loidolt M, Westphal V, et al (2017) Multicolour nanoscopy of  
868 fixed and living cells with a single STED beam and hyperspectral detection.  
869 *Scientific Reports* 7(1):46,492. <https://doi.org/10.1038/srep46492>
- 870 Xu L, Rönnlund D, Aspenström P, et al (2016) Resolution, target density  
871 and labeling effects in colocalization studies – suppression of false positives  
872 by nanoscopy and modified algorithms. *The FEBS Journal* 283(5):882–898.  
873 <https://doi.org/10.1111/febs.13652>
- 874 Zaritsky A, Obolski U, Gan Z, et al (2017) Decoupling global biases and local  
875 interactions between cell biological variables. *eLife* 6:e22,323. [https://doi.](https://doi.org/10.7554/eLife.22323)  
876 [org/10.7554/eLife.22323](https://doi.org/10.7554/eLife.22323)
- 877 Zhang L, Li Y, Nevatia R (2008) Global data association for multi-object track-  
878 ing using network flows. In: 2008 IEEE Conference on Computer Vision and  
879 Pattern Recognition, pp 1–8, <https://doi.org/10.1109/CVPR.2008.4587584>
